# Supplementary material for: Dependence of Bacterial Chemotaxis on Gradient Shape and Adaptation Rate
Source: PLOS journal article supplement (doi:10.1371/journal.pcbi.1000242), 2008-12-18
Supplement: S7 (10.1371/journal.pcbi.1000242.s007) [file journal.pcbi.1000242.s007]

| Description                   | Value [1/s] |          |          |
|-------------------------------|-------------|----------|----------|
|                               | ref. (1)    | ref. (2) | ref. (3) |
| CheR catalytic rate           | 0.819       | 0.39     | 0.75     |
| CheB catalytic rate           | 0.155       | 6.3      | 0.6      |
| CheA autophosphorylation rate | 15.5        | 50       | 23.5     |
| CheY phosphorylation rate     | 15          | 530      | 530      |
| CheB phosphorylation rate     | 15          | 15.9     | 53       |
| CheY dephosphorylation rate   | 14.5        | 30.1     | 30       |

**Supplementary Table S1.**

Rates of reactions involved in the signaling pathway, according to (1) Morton-Firth et al, 1999; (2) Kollmann et al., 2005; (3) Emonet and Cluzel, 2008.
